# Supplementary material
Source: PubMed Central journal article supplement (PMC3154678)
Supplement: supp_00131.2011_MMR_Paper_AJP_SI_2June2011.pdf [file supp_00131.2011_MMR_Paper_AJP_SI_2June2011.pdf]

**Supplemental information for “Mechanical control of cation channels in the myogenic response”**

Brian E. Carlson<sup>1</sup> and Daniel A. Beard<sup>1,2</sup>

<sup>1</sup>Biotechnology and Bioengineering Center, Medical College of Wisconsin

<sup>2</sup>Department of Physiology, Medical College of Wisconsin

## 1. TABLES OF FIXED PARAMETERS

Table S1: Fixed parameters used in vessel wall mechanics model

| Fixed parameter     | Units         | Mesenteric arteriole* | Femoral arteriole* |
|---------------------|---------------|-----------------------|--------------------|
| $C_{pass}$          | N/m           | 1.168                 | 1.416              |
| $C'_{pass}$         | unitless      | 7.240                 | 7.901              |
| $D_{p100}$          | $\mu\text{m}$ | 150.0                 | 172.8              |
| $C_{act}$           | N/m           | 1.108                 | 1.499              |
| $C'_{act}$          | unitless      | 0.843                 | 0.742              |
| $C''_{act}$         | unitless      | 0.406                 | 0.353              |
| $\delta_{wall,ref}$ | $\mu\text{m}$ | 6.16                  | 8.98               |
| $D_{ref}$           | $\mu\text{m}$ | 151                   | 171                |

\* Fixed parameters used here from optimized fits obtained in (8) to the data in Figure 1 of (6) for the normal control of Wistar-Kyoto rat mesenteric and femoral arterioles except for the reference values of wall thickness and diameter which are direct measurements made in original experimental study.

Table S2: Fixed parameters used VSM crossbridge model

| Fixed parameter  | Units                    | Value* |
|------------------|--------------------------|--------|
| $K_2$            | 1/s                      | 0.5    |
| $K_3$            | 1/s                      | 0.4    |
| $K_4$            | 1/s                      | 0.1    |
| $K_5$            | 1/s                      | 0.5    |
| $K_7$            | 1/s                      | 0.1    |
| $(AM+AMp)_{max}$ | unitless                 | 0.8    |
| $\gamma$         | $\mu\text{M}^3/\text{s}$ | 17.0   |

\* All fixed parameter values are from (14)

Table S3: Fixed parameters used in VSM  $\text{Ca}^{2+}$  handling and electrophysiology model

| Fixed parameter                            | Description       | Units                                           | Value                  | Ref |
|--------------------------------------------|-------------------|-------------------------------------------------|------------------------|-----|
| Standard constants and VSM cell properties |                   |                                                 |                        |     |
| $F$                                        | Faraday constant  | C/mole                                          | 96485.34               | --  |
| $R$                                        | Gas constant      | $(\text{C}^*\text{mV})/(\text{K}^*\text{mole})$ | 8314.472               | --  |
| $T$                                        | Temperature       | K                                               | 293                    | --  |
| $N_{Av}$                                   | Avogadro's number | 1/mole                                          | $6.022 \times 10^{23}$ | --  |

|                                                                                                    |                                                                 |                    |                                      |                   |
|----------------------------------------------------------------------------------------------------|-----------------------------------------------------------------|--------------------|--------------------------------------|-------------------|
| $C_m$                                                                                              | Total membrane capacitance                                      | pF                 | 25                                   | *                 |
| $A_m$                                                                                              | Total membrane area                                             | cm <sup>2</sup>    | $2.5 \times 10^{-5}$                 | *                 |
| $z_K$                                                                                              | Potassium valence                                               | unitless           | 1                                    | --                |
| $z_{Na}$                                                                                           | Sodium valence                                                  | unitless           | 1                                    | --                |
| $z_{Ca}$                                                                                           | Calcium valence                                                 | unitless           | 2                                    | --                |
| $z_{Cl}$                                                                                           | Chloride valence                                                | unitless           | -1                                   | --                |
| $Ca_e$                                                                                             | External Ca <sup>2+</sup> concentration                         | mM                 | 2.0                                  | (30) <sup>#</sup> |
| $Na_e$                                                                                             | External Na <sup>+</sup> concentration                          | mM                 | 140.0                                | (30) <sup>#</sup> |
| $K_e$                                                                                              | External K <sup>+</sup> concentration                           | mM                 | 5.0                                  | (30) <sup>#</sup> |
| $Cl_e$                                                                                             | External Cl <sup>-</sup> concentration                          | mM                 | 129.0                                | *                 |
| $Vol_i$                                                                                            | Cytosolic volume                                                | pL                 | 1.0                                  | (30) <sup>#</sup> |
| $Vol_{Ca}$                                                                                         | Cytosolic volume available to Ca <sup>2+</sup>                  | pL                 | 0.7                                  | (30) <sup>#</sup> |
| $Vol_{SRu}$                                                                                        | SR uptake volume                                                | pL                 | 0.07                                 | (30) <sup>#</sup> |
| $Vol_{SRr}$                                                                                        | SR release volume                                               | pL                 | 0.007                                | (19) <sup>#</sup> |
| <b>L-Type voltage operated Ca<sup>2+</sup> channel (CaL)</b>                                       |                                                                 |                    |                                      |                   |
| $P_{VOCC}$                                                                                         | CaL whole cell permeability                                     | cm/s               | $1.88 \times 10^{-5}$                | (16) <sup>§</sup> |
| <b>Large conductance, Ca<sup>2+</sup>-activated K<sup>+</sup> channel (BK<sub>Ca</sub>)</b>        |                                                                 |                    |                                      |                   |
| $N_{BKCa}$                                                                                         | BK <sub>Ca</sub> channel density                                | 1/cm <sup>2</sup>  | $6.6 \times 10^6$                    | (25) <sup>§</sup> |
| $\tau_{pf}$                                                                                        | BK <sub>Ca</sub> fast time constant                             | ms                 | 0.84                                 | (4) <sup>§</sup>  |
| $\tau_{ps}$                                                                                        | BK <sub>Ca</sub> slow time constant                             | ms                 | 35.9                                 | (4) <sup>§</sup>  |
| $dV_{50,KCaNO}$                                                                                    | BK <sub>Ca</sub> max NO-independent V <sub>50,KCa</sub> shift   | mV                 | 46.3                                 | (20) <sup>§</sup> |
| $dV_{50,KCaGMP}$                                                                                   | BK <sub>Ca</sub> max cGMP-independent V <sub>50,KCa</sub> shift | mV                 | 76                                   | (26) <sup>§</sup> |
| $P_{BKCa}$                                                                                         | BK <sub>Ca</sub> single channel permeability                    | cm <sup>3</sup> /s | $3.9 \times 10^{-13}$                | (20) <sup>#</sup> |
| <b>Voltage-dependent K<sup>+</sup> channel (K<sub>v</sub>)</b>                                     |                                                                 |                    |                                      |                   |
| $g_{Kv}$                                                                                           | K <sub>v</sub> maximal conductance                              | nS                 | 1.35                                 | (17) <sup>§</sup> |
| $\tau_{q1}$                                                                                        | K <sub>v</sub> fast inactivation time constant                  | ms                 | 371                                  | (17) <sup>§</sup> |
| $\tau_{q2}$                                                                                        | K <sub>v</sub> slow inactivation time constant                  | ms                 | 2884                                 | (17) <sup>§</sup> |
| <b>Unspecified K leak channel (K<sub>leak</sub>) including ATP sensitive K<sup>+</sup> channel</b> |                                                                 |                    |                                      |                   |
| $g_{Kleak}$                                                                                        | K <sub>leak</sub> maximal conductance                           | nS                 | 0.067                                | (22) <sup>§</sup> |
| <b>Non-selective cation channel (NSC)</b>                                                          |                                                                 |                    |                                      |                   |
| $K_{NSC}$                                                                                          | NSC ½ max activation DAG concentration                          | mM                 | <b><math>3 \times 10^{-3}</math></b> | (3) <sup>§</sup>  |
| $d_{NSC}^{\min}$                                                                                   | NSC minimum constituent activation                              | unitless           | 0.0244                               | (11) <sup>§</sup> |
| $P_{NaNSC}$                                                                                        | NSC Na <sup>+</sup> whole cell permeability                     | cm/s               | $5.11 \times 10^{-7}$                | (11) <sup>§</sup> |
| $P_{KNSC}$                                                                                         | NSC K <sup>+</sup> whole cell permeability                      | cm/s               | $5.42 \times 10^{-7}$                | (11) <sup>§</sup> |

|                                                             |                                                                |                                                                                       |                       |                   |
|-------------------------------------------------------------|----------------------------------------------------------------|---------------------------------------------------------------------------------------|-----------------------|-------------------|
| $P_{CaNSC}$                                                 | NSC $Ca^{2+}$ whole cell permeability                          | cm/s                                                                                  | $2.32 \times 10^{-6}$ | (11) <sup>§</sup> |
| Store-operated non-selective cation channel (SOC)           |                                                                |                                                                                       |                       |                   |
| $g_{CaSOC}$                                                 | SOC maximal $Ca^{2+}$ conductance                              | nS                                                                                    | 0.0083                | (1) <sup>§</sup>  |
| $g_{NaSOC}$                                                 | SOC maximal $Na^{+}$ conductance                               | nS                                                                                    | 0.0575                | (2) <sup>§</sup>  |
| $K_{SOC}$                                                   | SOC $\frac{1}{2}$ max activation $Ca^{2+}$ concentration       | mM                                                                                    | $1 \times 10^{-4}$    | (24) <sup>§</sup> |
| $\tau_{SOC}$                                                | <b>SOC activation time constant</b>                            | <b>ms</b>                                                                             | <b>100</b>            | *                 |
| $Ca^{2+}$ -activated $Cl^{-}$ channel ( $Cl_{Ca}$ )         |                                                                |                                                                                       |                       |                   |
| $g_{ClCa}$                                                  | $Cl_{Ca}$ maximal conductance density                          | nS/pF                                                                                 | 0.23                  | (18) <sup>§</sup> |
| $R_{ClcGMPmin}$                                             | $Cl_{Ca}$ cGMP-indep open probability coeff                    | unitless                                                                              | 0.0132                | (18) <sup>§</sup> |
| $n_{ClCa}$                                                  | $Cl_{Ca}$ $Ca^{2+}$ Hill coefficient                           | unitless                                                                              | 2                     | (18) <sup>§</sup> |
| $K_{ClCa}$                                                  | $Cl_{Ca}$ $\frac{1}{2}$ max activation $Ca^{2+}$ concentration | mM                                                                                    | $3.65 \times 10^{-4}$ | *                 |
| $n_{ClcGMP}$                                                | $Cl_{Ca}$ cGMP Hill coefficient                                | unitless                                                                              | 3.3                   | (18) <sup>#</sup> |
| $K_{ClcGMP}$                                                | $Cl_{Ca}$ $\frac{1}{2}$ max activation cGMP concentration      | mM                                                                                    | $6.4 \times 10^{-3}$  | (18) <sup>#</sup> |
| Plasma membrane $Ca^{2+}$ -ATPase (PMCA)                    |                                                                |                                                                                       |                       |                   |
| $\bar{I}_{PMCA}$                                            | PMCA maximal current                                           | pA                                                                                    | 5.37                  | *                 |
| $K_{mPMCA}$                                                 | PMCA Michaelis constant                                        | mM                                                                                    | $1.70 \times 10^{-4}$ | (23) <sup>#</sup> |
| Plasma membrane $Na^{+}$ - $Ca^{2+}$ exchanger (NCX)        |                                                                |                                                                                       |                       |                   |
| $g_{NCX}$                                                   | NCX maximal current                                            | <b>pA</b>                                                                             | <b>0.000487</b>       | *                 |
| $d_{NCX}$                                                   | NCX scaling factor                                             | unitless                                                                              | 0.0003                | (15) <sup>#</sup> |
| $\gamma_{NCX}$                                              | NCX non-symm V-dep partition parameter                         | unitless                                                                              | 0.45                  | (15) <sup>#</sup> |
| $Na^{+}$ - $K^{+}$ pump (NaK)                               |                                                                |                                                                                       |                       |                   |
| $\bar{I}_{NaK}$                                             | NaK maximal current                                            | pA                                                                                    | 2.3083                | *                 |
| $n_{HKe}$                                                   | NaK external $K^{+}$ Hill coefficient                          | unitless                                                                              | 1.1                   | (21) <sup>#</sup> |
| $K_{dKe}$                                                   | NaK external $K^{+}$ binding constant                          | mM                                                                                    | 1.6                   | (21) <sup>#</sup> |
| $n_{HNai}$                                                  | NaK internal $Na^{+}$ Hill coefficient                         | unitless                                                                              | 1.7                   | (21) <sup>#</sup> |
| $K_{dNai}$                                                  | NaK internal $Na^{+}$ binding constant                         | mM                                                                                    | 22                    | (21) <sup>#</sup> |
| $Q_{10}$                                                    | NaK temperature correction                                     | unitless                                                                              | 1.87                  | *                 |
| $Na^{+}$ - $K^{+}$ - $Cl^{-}$ cotransporter (NaKCl)         |                                                                |                                                                                       |                       |                   |
| $L_{NaKCl}$                                                 | NaKCl coefficient                                              | <b><math>\text{mole}^2 \times 10^{-5} / (\text{J}^* \text{s} * \text{m}^2)</math></b> | $1.79 \times 10^{-8}$ | *                 |
| Sarcoplasmic reticulum $IP_3$ receptor (SRIP <sub>3</sub> ) |                                                                |                                                                                       |                       |                   |
| $\bar{I}_{IP_3}$                                            | SRIP <sub>3</sub> maximal $Ca^{2+}$ release                    | <b>1/ms</b>                                                                           | $2880 \times 10^{-6}$ | (10) <sup>#</sup> |
| $K_{IP_3}$                                                  | SRIP <sub>3</sub> dissociation constant                        | mM                                                                                    | $1.20 \times 10^{-4}$ | (5) <sup>#</sup>  |
| $K_{IP_3}^{act}$                                            | SRIP <sub>3</sub> dissociation constant $Ca^{2+}$ activation   | mM                                                                                    | $1.70 \times 10^{-4}$ | (10) <sup>#</sup> |

|                                                                      |                                                                     |                         |                        |                   |
|----------------------------------------------------------------------|---------------------------------------------------------------------|-------------------------|------------------------|-------------------|
| $k_{IP_3}^{on}$                                                      | SRIP <sub>3</sub> Ca <sup>2+</sup> binding rate to inhibition site  | 1/(ms*mM)               | 1.4                    | (5) <sup>#</sup>  |
| $K_{IP_3}^{inh}$                                                     | SRIP <sub>3</sub> dissociation constant Ca <sup>2+</sup> inhibition | mM                      | 1x10 <sup>-4</sup>     | (10) <sup>#</sup> |
| Sarcoplasmic reticulum SERCA, uptake, release and internal diffusion |                                                                     |                         |                        |                   |
| $\bar{I}_{SERCA}$                                                    | SERCA maximal current                                               | pA                      | 6.68                   | (30) <sup>#</sup> |
| $K_{mup}$                                                            | SERCA Michaelis constant                                            | mM                      | 1x10 <sup>-3</sup>     | (19) <sup>#</sup> |
| $\tau_r$                                                             | SR internal diffusion time constant                                 | ms                      | 1000                   | (30) <sup>#</sup> |
| $R_{leak}$                                                           | SR Ca <sup>2+</sup> leak parameter                                  | unitless                | 1.07x10 <sup>-5</sup>  | (7) <sup>§</sup>  |
| $\tau_{rel}$                                                         | SR Ca <sup>2+</sup> release time constant                           | ms                      | 0.0333                 | (30) <sup>#</sup> |
| $\overline{CSQN}$                                                    | SR average calsequestrin concentration                              | mM                      | 15                     | (12) <sup>#</sup> |
| $K_{CSQN}$                                                           | SR calsequestrin binding constant                                   | mM                      | 0.8                    | (28) <sup>#</sup> |
| Sarcoplasmic reticulum four-state ryanodine receptor (RyR)           |                                                                     |                         |                        |                   |
| $K_{r1}$                                                             | RyR Ca <sup>2+</sup> binding to activation site                     | 1/(ms*mM <sup>2</sup> ) | 2500                   | (30) <sup>#</sup> |
| $K_{r2}$                                                             | RyR Ca <sup>2+</sup> binding to inactivation site                   | 1/(ms*mM)               | 1.05                   | (30) <sup>#</sup> |
| $K_{mr1}$                                                            | RyR Ca <sup>2+</sup> dissociation from activation site              | 1/ms                    | 0.0076                 | (30) <sup>#</sup> |
| $K_{mr2}$                                                            | RyR Ca <sup>2+</sup> dissociation from inactivation site            | 1/ms                    | 0.084                  | (30) <sup>#</sup> |
| $\alpha_1$ -adrenoreceptor activation and IP <sub>3</sub> formation  |                                                                     |                         |                        |                   |
| $k_{rG}$                                                             | Receptor recycling rate                                             | 1/ms                    | 1.75x10 <sup>-7</sup>  | (5) <sup>#</sup>  |
| $\xi_G$                                                              | Mobile receptor fraction                                            | unitless                | 0.85                   | (5) <sup>#</sup>  |
| $R_{TG}$                                                             | Total number of receptors                                           | # receptors             | 2x10 <sup>4</sup>      | (5) <sup>#</sup>  |
| $k_{pG}$                                                             | Receptor phosphorylation rate                                       | 1/ms                    | 0                      | *                 |
| $K_{IG}$                                                             | Unphosphorylated receptor dissoc constant                           | mM                      | 0.01                   | (5) <sup>#</sup>  |
| $k_{eG}$                                                             | Receptor endocytosis rate                                           | 1/ms                    | 6x10 <sup>-6</sup>     | (5) <sup>#</sup>  |
| $K_{2G}$                                                             | Phosphorylated receptor dissoc constant                             | mM                      | 0.2                    | (5) <sup>#</sup>  |
| $k_{aG}$                                                             | G-protein activation rate                                           | 1/ms                    | 0.17x10 <sup>-3</sup>  | (5) <sup>#</sup>  |
| $G_{TG}$                                                             | Total # of G-protein molecules                                      | # molecules             | 1x10 <sup>5</sup>      | (5) <sup>#</sup>  |
| $k_{dG}$                                                             | G-protein deactivation rate                                         | 1/ms                    | 1.5x10 <sup>-3</sup>   | (5) <sup>#</sup>  |
| $\alpha_G$                                                           | Effective signal gain parameter                                     | 1/ms                    | 2.781x10 <sup>-8</sup> | (5) <sup>#</sup>  |
| $K_{cG}$                                                             | Ca <sup>2+</sup> -PLC dissociation constant                         | mM                      | 0.4x10 <sup>-3</sup>   | (5) <sup>#</sup>  |
| $k_{degG}$                                                           | IP <sub>3</sub> degradation rate                                    | 1/ms                    | 1.25x10 <sup>-3</sup>  | (5) <sup>#</sup>  |
| $r_{rG}$                                                             | PIP <sub>2</sub> replenishment rate                                 | 1/ms                    | 0.015x10 <sup>-3</sup> | (5) <sup>#</sup>  |
| $PIP_{2T}$                                                           | Total # of PIP <sub>2</sub> molecules                               | # molecules             | 5x10 <sup>7</sup>      | (5) <sup>#</sup>  |
| sGC activation and cGMP formation                                    |                                                                     |                         |                        |                   |
| $V_{cGMPmax}$                                                        | Maximal cGMP formation rate                                         | mM/ms                   | 1.26x10 <sup>-7</sup>  | (9) <sup>§</sup>  |

|                                      |                                                         |           |                         |                       |
|--------------------------------------|---------------------------------------------------------|-----------|-------------------------|-----------------------|
| $k_{2sGC}$                           | sGC fully act E <sub>3</sub> NO-indep rate of formation | 1/ms      | 0.64x10 <sup>-5</sup>   | (27) <sup>#</sup>     |
| $k_{3sGC}$                           | sGC fully act E <sub>3</sub> NO-dep rate of formation   | 1/(ms*mM) | 4.2                     | (27) <sup>#</sup>     |
| $k_{m1sGC}$                          | sGC partially act E <sub>2</sub> rate of dissociation   | 1/ms      | 15x10 <sup>-3</sup>     | (27) <sup>#</sup>     |
| $k_{DsGC}$                           | sGC fully act E <sub>3</sub> NO-dep rate of dissoc      | 1/ms      | 0.4x10 <sup>-3</sup>    | (27) <sup>#</sup>     |
| $k_{m2sGC}$                          | sGC fully act E <sub>3</sub> NO-indep rate of dissoc    | 1/ms      | 0.1x10 <sup>-6</sup>    | (27) <sup>#</sup>     |
| $k_{1sGC}$                           | sGC partially act E <sub>2</sub> rate of formation      | 1/(ms*mM) | 2x10 <sup>3</sup>       | (27) <sup>#</sup>     |
| $k_{DrsGC}$                          | cGMP inverse of max $\tau$ of formation rate            | 1/ms      | 0.1x10 <sup>-3</sup>    | *                     |
| $k_{pdecGMP}$                        | cGMP PDE catalyzed hydrolysis rate                      | 1/ms      | 0.0695x10 <sup>-3</sup> | (31) <sup>#</sup>     |
| $K_{mpde}$                           | cGMP PDE catalysis Michaelis constant                   | mM        | 1x10 <sup>-3</sup>      | *                     |
| <hr/>                                |                                                         |           |                         |                       |
| Cytosolic Ca <sup>2+</sup> buffering |                                                         |           |                         |                       |
| $\bar{S}_{CM}$                       | Calmodulin concentration                                | mM        | 0.1                     | (30) <sup>#</sup>     |
| $K_{dCM}$                            | Calmodulin-Ca <sup>2+</sup> dissociation constant       | mM        | 2.60x10 <sup>-4</sup>   | (30) <sup>#</sup>     |
| $\bar{B}_F$                          | Generic Ca <sup>2+</sup> buffer concentration           | mM        | 0.1                     | (10, 29) <sup>§</sup> |
| $K_{dB}$                             | Generic Ca <sup>2+</sup> buffer dissociation constant   | mM        | 5.298x10 <sup>-4</sup>  | (10, 29) <sup>§</sup> |

\* Parameter value assumed or estimated in Kapela et al. (13)

# Parameter value determined directly in paper

§ Parameter value determined from model fits to or analysis of data presented in paper

Parameters, units and values in **bold** indicate corrections and omissions from that originally published in Kapela et al. (13).

## 2. COMPLETE SET OF INTEGRATED MODEL EQUATIONS

### Model 1: Vessel wall mechanics model

The set of equations given below can be used to implicitly solve for a vessel diameter,  $D$ , as a function of the intraluminal pressure,  $P$ , and the activation,  $Act$ , as determined from running Model 2 and Model 3 to steady-state solutions. If these equations are to solve for myogenic or maximally active curves root finding is more easily performed in the stress-strain space rather than the pressure-diameter space due to hysteresis at high intraluminal pressure that often leads to multiple diameters at a given pressure but less often gives multiple strains for a given stress.

Algebraic equations:

$$\delta_{wall} = -\frac{D}{2} + \sqrt{\left(\frac{D}{2}\right)^2 + \frac{CSA_{ref}}{\pi}} \quad [S1]$$

$$\sigma_{total} = \frac{PD}{2\delta_{wall}} \quad [S2]$$

$$\sigma_{pass} = \frac{C_{pass}}{\delta_{wall}} \exp\left[C'_{pass}\left(\frac{D}{D_{p100}} - 1\right)\right] \quad [S3]$$

$$\sigma_{act}^{max} = \frac{C_{act}}{\delta_{wall}} \exp\left[-\left(\frac{D/D_{p100} - C'_{act}}{C''_{act}}\right)^2\right] \quad [S4]$$

$$\sigma_{total} = \sigma_{pass} + Act \sigma_{act}^{max} \quad [S5]$$

Calculation of remaining fixed parameter:

$$CSA_{ref} = \pi\delta_{wall,ref}\left(D_{ref} + \delta_{wall,ref}\right) \quad [S6]$$

### Model 2: VSM crossbridge force generation model

A dynamic VSM crossbridge model is used to determine the steady state VSM activation,  $Act$ , as a function of cytosolic  $Ca^{2+}$ ,  $Ca_i$ . The system of differential equations is run to steady state for a range of  $Ca_i$  and then the Hill expression given below is used to fit the simulation results. This is done to prevent a steady-state simulation to be run repeatedly in the integrated model and at this point we are not interested in the dynamic response of the system.

Algebraic and differential equations:

$$Act = \frac{AMp + AM}{(AMp + AM)_{max}} \quad [S7]$$

$$K_1 = K_6 = \gamma Ca_i^3 \quad [S8]$$

$$\frac{dM}{dt} = -K_1M + K_2Mp + K_7AM \quad [S9]$$

$$\frac{dMp}{dt} = K_4AMp + K_1M - (K_2 + K_3)Mp \quad [S10]$$

$$\frac{dAMp}{dt} = K_3Mp + K_6AM - (K_4 + K_5)AMp \quad [S11]$$

$$\frac{dAM}{dt} = K_5AMp - (K_6 + K_7)AM \quad [S12]$$

Setting of initial conditions:

$$M = Mp = AMp = AM = 0.25 \quad [S13]$$

Hill expression for fit of steady-state VSM activation:

$$Act = \frac{Ca_i^{n_{XB}}}{K_{CaXB}^{n_{XB}} + Ca_i^{n_{XB}}} \quad [S14]$$

### **Model 3: VSM Ca<sup>2+</sup> handling and electrophysiology model**

Kapela et al. have made several clarifications and modifications to the original published model that are incorporated into this current model. These were determined from their model code and communications with the authors. For sGC activation, the time constant for the change in rate of cGMP formation,  $\tau_{sGC}$ , is determined differently as indicated below. Additionally the activation gating for the store-operated cation channel has been changed from a simple algebraic relationship to the first-order kinetics given below. Corrections have been made to fixed parameter values for  $K_{NSC}$  and  $g_{NCX}$  and units on  $g_{NCX}$ ,  $L_{NaKCl}$  and  $\bar{I}_{IP_3}$  as indicated in Table S3. A minimal set of initial conditions is specified and then the remaining initial conditions are calculated as given below. For the  $\alpha_1$ -adrenoreceptor and IP<sub>3</sub> formation equations it was not clear whether the ratio of activities of the ligand-bound to ligand-unbound receptor species,  $\delta_G$ , is a variable or fixed parameter. In this model  $\delta_G$  (here given as  $\delta_{G0}$ ) is estimated based on the initial conditions and held constant throughout the simulation as specified below. Other variables such as the rate of hydrolysis of PIP<sub>2</sub>,  $r_{hG}$ , are initially estimated and then recalculated during the simulation. Standard units of concentration, time, membrane potential, vessel stress and current are mM, ms, mV, kPa and pA in this portion of the integrated model. Note that for the myogenic response both the NE stimulation and NO relaxation mechanisms are inactive and vessel diameter is driven only by step changes in pressure. The model retains these inactive pathways to remain consistent with the previous model by Kapela et al. In the simulations used in this study a single stress- or strain-controlled channel was inserted into the model at a time. The sets of equations below show all formulations of stress- and strain-controlled channels used.

Algebraic and differential equations:

*Reversal potentials:*

$$E_K = \frac{RT}{z_K F} \ln \left( \frac{K_e}{K_i} \right) \quad [S15]$$

$$E_{Na} = \frac{RT}{z_{Na} F} \ln \left( \frac{Na_e}{Na_i} \right) \quad [S16]$$

$$E_{Ca} = \frac{RT}{z_{Ca} F} \ln \left( \frac{Ca_e}{Ca_i} \right) \quad [S17]$$



$$E_{Cl} = \frac{RT}{z_{Cl}F} \ln \left( \frac{Cl_e}{Cl_i} \right) \quad [S18]$$

*Mechanically-controlled supplementary Ca<sup>2+</sup> channel:*

Formulated as a stress-controlled channel (channel variant 4):

$$\bar{h}_{Ca\sigma CC} = \frac{\sigma_{total}^{n_{Ca\sigma CC}}}{\sigma_{50, Ca\sigma CC}^{n_{Ca\sigma CC}} + \sigma_{total}^{n_{Ca\sigma CC}}} \quad [S19]$$

$$I_{Ca\sigma CC} = g_{Ca\sigma CC}^{\max} h_{Ca\sigma CC} (V_m - E_{Ca}) \quad [S20]$$

$$\frac{dh_{Ca\sigma CC}}{dt} = \frac{\bar{h}_{Ca\sigma CC} - h_{Ca\sigma CC}}{\tau_{Ca\sigma CC}} \quad [S21]$$

Formulated as a strain-controlled channel:

$$\bar{h}_{Ca\varepsilon CC} = \frac{\varepsilon_{total}^{n_{Ca\varepsilon CC}}}{\varepsilon_{50, Ca\varepsilon CC}^{n_{Ca\varepsilon CC}} + \varepsilon_{total}^{n_{Ca\varepsilon CC}}} \quad [S22]$$

$$I_{Ca\varepsilon CC} = g_{Ca\varepsilon CC}^{\max} h_{Ca\varepsilon CC} (V_m - E_{Ca}) \quad [S23]$$

$$\frac{dh_{Ca\varepsilon CC}}{dt} = \frac{\bar{h}_{Ca\varepsilon CC} - h_{Ca\varepsilon CC}}{\tau_{Ca\varepsilon CC}} \quad [S24]$$

*Mechanically-controlled supplementary Na<sup>+</sup> channel:*

Formulated as a stress-controlled channel (channel variant 5):

$$\bar{h}_{Na\sigma CC} = \frac{\sigma_{total}^{n_{Na\sigma CC}}}{\sigma_{50, Na\sigma CC}^{n_{Na\sigma CC}} + \sigma_{total}^{n_{Na\sigma CC}}} \quad [S25]$$

$$I_{Na\sigma CC} = g_{Na\sigma CC}^{\max} h_{Na\sigma CC} (V_m - E_{Na}) \quad [S26]$$

$$\frac{dh_{Na\sigma CC}}{dt} = \frac{\bar{h}_{Na\sigma CC} - h_{Na\sigma CC}}{\tau_{Na\sigma CC}} \quad [S27]$$

Formulated as a strain-controlled channel:

$$\bar{h}_{Na\varepsilon CC} = \frac{\varepsilon_{total}^{n_{Na\varepsilon CC}}}{\varepsilon_{50, Na\varepsilon CC}^{n_{Na\varepsilon CC}} + \varepsilon_{total}^{n_{Na\varepsilon CC}}} \quad [S28]$$

$$I_{Na\varepsilon CC} = g_{Na\varepsilon CC}^{\max} h_{Na\varepsilon CC} (V_m - E_{Na}) \quad [S29]$$

$$\frac{dh_{Na\varepsilon CC}}{dt} = \frac{\bar{h}_{Na\varepsilon CC} - h_{Na\varepsilon CC}}{\tau_{Na\varepsilon CC}} \quad [S30]$$

*L-Type voltage operated Ca<sup>2+</sup> channel:*

Formulation from Kapela et al.:

$$\bar{d}_L = \frac{1}{1 + \exp(-V_m/8.3)} \quad [S31]$$

$$\bar{f}_L = \frac{1}{1 + \exp[(V_m + 42)/9.1]} \quad [S32]$$

$$\tau_{dL} = 2.5 \exp\left[-\left(\frac{V_m + 40}{30}\right)^2\right] + 1.15 \quad [S33]$$

$$\tau_{fL} = 65 \exp\left[-\left(\frac{V_m + 35}{25}\right)^2\right] + 45 \quad [S34]$$

$$I_{VOCC} = 10^6 A_m P_{VOCC} d_L f_L \frac{V_m (z_{Ca} F)^2}{RT} \frac{Ca_e - Ca_i \exp(V_m z_{Ca} F / RT)}{1 - \exp(V_m z_{Ca} F / RT)} \quad [S35]$$

$$\frac{dd_L}{dt} = \frac{\bar{d}_L - d_L}{\tau_{dL}} \quad [S36]$$

$$\frac{df_L}{dt} = \frac{\bar{f}_L - f_L}{\tau_{fL}} \quad [S37]$$

Formulated as a channel with vessel stress-control of gating voltage (channel variant 6), which is same as Kapela et al. formulation except the following three equations now replace [S31] and [S32]:

$$V_{CaL\sigma CC}^{off} = V_{CaL\sigma CC}^{offmax} \frac{\sigma_{total}^{n_{CaL\sigma CC}}}{\sigma_{50, CaL\sigma CC}^{n_{CaL\sigma CC}} + \sigma_{total}^{n_{CaL\sigma CC}}} \quad [S38]$$

$$\bar{d}_L = \frac{1}{1 + \exp\left[-(V_m + V_{CaL\sigma CC}^{off})/8.3\right]} \quad [S39]$$

$$\bar{f}_L = \frac{1}{1 + \exp\left[(V_m + V_{CaL\sigma CC}^{off} + 42)/9.1\right]} \quad [S40]$$

Formulated as a channel with vessel strain-control of gating voltage, which is the same as Kapela et al. formulation except the following three equations now replace [S31] and [S32]:

$$V_{CaL\varepsilon CC}^{off} = V_{CaL\varepsilon CC}^{offmax} \frac{\varepsilon_{total}^{n_{CaL\varepsilon CC}}}{\varepsilon_{50, CaL\varepsilon CC}^{n_{CaL\varepsilon CC}} + \varepsilon_{total}^{n_{CaL\varepsilon CC}}} \quad [S41]$$

$$\bar{d}_L = \frac{1}{1 + \exp\left[-(V_m + V_{CaL\varepsilon CC}^{off})/8.3\right]} \quad [S42]$$

$$\bar{f}_L = \frac{1}{1 + \exp\left[(V_m + V_{CaL\varepsilon CC}^{off} + 42)/9.1\right]} \quad [S43]$$

Formulated as a channel with vessel stress-control of conductance (channel variant 7), which is the same as Kapela et al. formulation except for the following 2 equations now replace [S35]:

$$\rho_{CaL\sigma CC} = 1 + (\rho_{\rho CaL\sigma CC}^{\max} - 1) \frac{\sigma_{total}^{n_{\rho CaL\sigma CC}}}{\sigma_{50, \rho CaL\sigma CC}^{n_{\rho CaL\sigma CC}} + \sigma_{total}^{n_{\rho CaL\sigma CC}}} \quad [S44]$$

$$I_{VOCC} = 10^6 A_m P_{VOCC} \rho_{CaL\sigma CC} d_L f_L \frac{V_m (z_{Ca} F)^2}{RT} \frac{Ca_e - Ca_i \exp(V_m z_{Ca} F / RT)}{1 - \exp(V_m z_{Ca} F / RT)} \quad [S45]$$

Formulated as a channel with vessel strain-control of conductance, which is the same as Kapela et al. formulation except for the following 2 equations now replace [S35]:

$$\rho_{CaL\varepsilon CC} = 1 + (\rho_{\rho CaL\varepsilon CC}^{\max} - 1) \frac{\varepsilon_{total}^{n_{\rho CaL\varepsilon CC}}}{\varepsilon_{50, \rho CaL\varepsilon CC}^{n_{\rho CaL\varepsilon CC}} + \varepsilon_{total}^{n_{\rho CaL\varepsilon CC}}} \quad [S46]$$

$$I_{VOCC} = 10^6 A_m P_{VOCC} \rho_{CaL\varepsilon CC} d_L f_L \frac{V_m (z_{Ca} F)^2}{RT} \frac{Ca_e - Ca_i \exp(V_m z_{Ca} F / RT)}{1 - \exp(V_m z_{Ca} F / RT)} \quad [S47]$$

*Large conductance  $Ca^{2+}$ -activated  $K^+$  channel:*

Formulation from Kapela et al.:

$$P_{KCa} = 0.17 p_f + 0.83 p_s \quad [S48]$$

$$R_{NO} = \frac{NO}{NO + 0.2 \times 10^{-3}} \quad [S49]$$

$$R_{cGMP} = \frac{cGMP^2}{cGMP^2 + (1.5 \times 10^{-3})^2} \quad [S50]$$

$$V_{50, KCa} = -41.7 \log(Ca_i) - 128.2 - (dV_{50, KCaNO} R_{NO}) - (dV_{50, KCa cGMP} R_{cGMP}) \quad [S51]$$

$$\bar{p}_o = \frac{1}{1 + \exp\left[-(V_m - V_{50, KCa})/18.25\right]} \quad [S52]$$

$$I_{BKCa} = 10^6 A_m N_{BKCa} P_{BKCa} P_{KCa} \frac{V_m (z_K F)^2}{RT} \frac{K_e - K_i \exp(V_m z_K F / RT)}{1 - \exp(V_m z_K F / RT)} \quad [S53]$$

$$\frac{dp_f}{dt} = \frac{\bar{p}_o - p_f}{\tau_{pf}} \quad [S54]$$

$$\frac{dp_s}{dt} = \frac{\bar{p}_o - p_s}{\tau_{ps}} \quad [S55]$$

Formulated as a channel with vessel stress-control of gating voltage (channel variant 8), which is same as Kapela et al. formulation except the following two equations now replace [S52]:

$$V_{BKCa\sigma CC}^{\text{off}} = V_{BKCa\sigma CC}^{\text{offmax}} \frac{\sigma_{total}^{n_{BKCa\sigma CC}}}{\sigma_{50, BKCa\sigma CC}^{n_{BKCa\sigma CC}} + \sigma_{total}^{n_{BKCa\sigma CC}}} \quad [S56]$$

$$\bar{p}_o = \frac{1}{1 + \exp\left[-(V_m + V_{BKCa\sigma CC}^{\text{off}} - V_{50, KCa})/18.25\right]} \quad [S57]$$

Formulated as a channel with vessel strain-control of gating voltage, which is same as Kapela et al. formulation except the following two equations now replace [S52]:

$$V_{BKCa\varepsilon CC}^{\text{off}} = V_{BKCa\varepsilon CC}^{\text{offmax}} \frac{\varepsilon_{\text{total}}^{n_{BKCa\varepsilon CC}}}{\varepsilon_{50, BKCa\varepsilon CC}^{n_{BKCa\varepsilon CC}} + \varepsilon_{\text{total}}^{n_{BKCa\varepsilon CC}}} \quad [\text{S58}]$$

$$\bar{p}_o = \frac{1}{1 + \exp\left[-(V_m + V_{BKCa\varepsilon CC}^{\text{off}} - V_{50, KCa})/18.25\right]} \quad [\text{S59}]$$

Formulated as a channel with vessel stress-control of conductance (channel variant 9), which is same as Kapela et al. formulation except the following two equations now replace [S53]:

$$\rho_{BKCa\sigma CC} = 1 - (1 - \rho_{\rho_{BKCa\sigma CC}}^{\text{max}}) \frac{\sigma_{\text{total}}^{n_{\rho_{BKCa\sigma CC}}}}{\sigma_{50, \rho_{BKCa\sigma CC}}^{n_{\rho_{BKCa\sigma CC}}} + \sigma_{\text{total}}^{n_{\rho_{BKCa\sigma CC}}}} \quad [\text{S60}]$$

$$I_{BKCa} = 10^6 A_m N_{BKCa} P_{BKCa} \rho_{BKCa\sigma CC} P_{KCa} \frac{V_m (z_K F)^2}{RT} \frac{K_e - K_i \exp(V_m z_K F / RT)}{1 - \exp(V_m z_K F / RT)} \quad [\text{S61}]$$

Formulated as a channel with vessel strain-control of gating voltage, which is same as Kapela et al. formulation except the following two equations now replace [S53]:

$$\rho_{BKCa\varepsilon CC} = 1 - (\rho_{\rho_{BKCa\varepsilon CC}}^{\text{max}} - 1) \frac{\varepsilon_{\text{total}}^{n_{\rho_{BKCa\varepsilon CC}}}}{\varepsilon_{50, \rho_{BKCa\varepsilon CC}}^{n_{\rho_{BKCa\varepsilon CC}}} + \varepsilon_{\text{total}}^{n_{\rho_{BKCa\varepsilon CC}}}} \quad [\text{S62}]$$

$$I_{BKCa} = 10^6 A_m N_{BKCa} P_{BKCa} \rho_{BKCa\varepsilon CC} P_{KCa} \frac{V_m (z_K F)^2}{RT} \frac{K_e - K_i \exp(V_m z_K F / RT)}{1 - \exp(V_m z_K F / RT)} \quad [\text{S63}]$$

*Voltage dependent K<sup>+</sup> channel:*

$$\bar{p}_K = \frac{1}{1 + \exp\left[-(V_m + 11)/15\right]} \quad [\text{S64}]$$

$$\bar{q} = \frac{1}{1 + \exp\left[(V_m + 40)/14\right]} \quad [\text{S65}]$$

$$\tau_{pK} = 61.49 \exp(-0.0268 V_m) \quad [\text{S66}]$$

$$I_{Kv} = g_{Kv} p_k (0.45 q_1 + 0.55 q_2) (V_m - E_K) \quad [\text{S67}]$$

$$\frac{dp_K}{dt} = \frac{\bar{p}_K - p_K}{\tau_{pK}} \quad [\text{S68}]$$

$$\frac{dq_1}{dt} = \frac{\bar{q} - q_1}{\tau_{q1}} \quad [\text{S69}]$$

$$\frac{dq_2}{dt} = \frac{\bar{q} - q_2}{\tau_{q2}} \quad [\text{S70}]$$

*Unspecified K<sup>+</sup> leak channel including ATP-sensitive K<sup>+</sup> channel:*

$$I_{Kleak} = g_{Kleak} (V_m - E_k) \quad [S71]$$

*Non-selective cation channel:*

Formulation from Kapela et al.:

$$DAG = IP_3 \quad [S72]$$

$$Po_{NSC} = 0.4344 + \frac{0.5656}{1 + \exp[-(V_m - 47.12)/24.24]} \quad [S73]$$

$$I_{NaNSC} = 10^6 A_m P_{NaNSC} \left( \frac{DAG}{DAG + K_{NSC}} + d_{NSC}^{\min} \right) Po_{NSC} \quad [S74]$$

$$* \frac{V_m (z_{Na} F)^2}{RT} \frac{Na_e - Na_i \exp(V_m z_{Na} F / RT)}{1 - \exp(V_m z_{Na} F / RT)}$$

$$I_{KNSC} = 10^6 A_m P_{KNSC} \left( \frac{DAG}{DAG + K_{NSC}} + d_{NSC}^{\min} \right) Po_{NSC} \quad [S75]$$

$$* \frac{V_m (z_K F)^2}{RT} \frac{K_e - K_i \exp(V_m z_K F / RT)}{1 - \exp(V_m z_K F / RT)}$$

$$I_{CaNSC} = 10^6 A_m P_{CaNSC} d_{NSC}^{\min} Po_{NSC} \frac{V_m (z_{Ca} F)^2}{RT} \frac{Ca_e - Ca_i \exp(V_m z_{Ca} F / RT)}{1 - \exp(V_m z_{Ca} F / RT)} \quad [S76]$$

$$I_{NSC} = I_{NaNSC} + I_{KNSC} + I_{CaNSC} \quad [S77]$$

Formulated as a channel with vessel stress-control of  $Ca^{2+}$  conductance (channel variant 1), which is same as Kapela et al. formulation except the following two equations now replace [S76]:

$$\rho_{CaNSC\sigma CC} = 1 + (\rho_{CaNSC\sigma CC}^{\max} - 1) \frac{\sigma_{total}^{n_{CaNSC\sigma CC}}}{\sigma_{50, CaNSC\sigma CC}^{n_{CaNSC\sigma CC}} + \sigma_{total}^{n_{CaNSC\sigma CC}}} \quad [S78]$$

$$I_{CaNSC} = 10^6 A_m P_{CaNSC} d_{NSC}^{\min} \rho_{CaNSC\sigma CC} Po_{NSC} \frac{V_m (z_{Ca} F)^2}{RT} \frac{Ca_e - Ca_i \exp(V_m z_{Ca} F / RT)}{1 - \exp(V_m z_{Ca} F / RT)} \quad [S79]$$

Formulated as a channel with vessel strain-control of  $Ca^{2+}$  conductance, which is same as Kapela et al. formulation except the following two equations now replace [S76]:

$$\rho_{CaNSC\varepsilon CC} = 1 + (\rho_{CaNSC\varepsilon CC}^{\max} - 1) \frac{\varepsilon_{total}^{n_{CaNSC\varepsilon CC}}}{\varepsilon_{50, CaNSC\varepsilon CC}^{n_{CaNSC\varepsilon CC}} + \varepsilon_{total}^{n_{CaNSC\varepsilon CC}}} \quad [S80]$$

$$I_{CaNSC} = 10^6 A_m P_{CaNSC} d_{NSC}^{\min} \rho_{CaNSC\varepsilon CC} Po_{NSC} \frac{V_m (z_{Ca} F)^2}{RT} \frac{Ca_e - Ca_i \exp(V_m z_{Ca} F / RT)}{1 - \exp(V_m z_{Ca} F / RT)} \quad [S81]$$

Formulated as a channel with vessel stress-control of  $Na^+$  conductance (channel variant 2), which is same as Kapela et al. formulation except the following two equations now replace [S74]:

$$\rho_{NaNSC\sigma CC} = 1 + (\rho_{NaNSC\sigma CC}^{\max} - 1) \frac{\sigma_{total}^{n_{NaNSC\sigma CC}}}{\sigma_{50,NaNSC\sigma CC}^{n_{NaNSC\sigma CC}} + \sigma_{total}^{n_{NaNSC\sigma CC}}} \quad [S82]$$

$$I_{NaNSC} = 10^6 A_m P_{NaNSC} \left( \frac{DAG}{DAG + K_{NSC}} + d_{NSC}^{\min} \right) \rho_{NaNSC\sigma CC} P_{O_{NSC}} \\ * \frac{V_m (z_{Na} F)^2}{RT} \frac{Na_e - Na_i \exp(V_m z_{Na} F / RT)}{1 - \exp(V_m z_{Na} F / RT)} \quad [S83]$$

Formulated as a channel with vessel stress-control of  $Na^+$  conductance, which is same as Kapela et al. formulation except the following two equations now replace [S74]:

$$\rho_{NaNSC\varepsilon CC} = 1 + (\rho_{NaNSC\varepsilon CC}^{\max} - 1) \frac{\varepsilon_{total}^{n_{NaNSC\varepsilon CC}}}{\varepsilon_{50,NaNSC\varepsilon CC}^{n_{NaNSC\varepsilon CC}} + \varepsilon_{total}^{n_{NaNSC\varepsilon CC}}} \quad [S84]$$

$$I_{NaNSC} = 10^6 A_m P_{NaNSC} \left( \frac{DAG}{DAG + K_{NSC}} + d_{NSC}^{\min} \right) \rho_{NaNSC\varepsilon CC} P_{O_{NSC}} \\ * \frac{V_m (z_{Na} F)^2}{RT} \frac{Na_e - Na_i \exp(V_m z_{Na} F / RT)}{1 - \exp(V_m z_{Na} F / RT)} \quad [S85]$$

Formulated as a channel with vessel stress-control of  $Ca^{2+}$  and  $Na^+$  gating voltage (channel variant 3), which is same as Kapela et al. formulation except the following two equations now replace [S73]:

$$V_{NSC\sigma CC}^{off} = V_{NSC\sigma CC}^{off \max} \frac{\sigma_{total}^{n_{NSC\sigma CC}}}{\sigma_{50,NSC\sigma CC}^{n_{NSC\sigma CC}} + \sigma_{total}^{n_{NSC\sigma CC}}} \quad [S86]$$

$$P_{O_{NSC}} = 0.4344 + \frac{0.5656}{1 + \exp\left[-(V_m + V_{NSC\sigma CC}^{off} - 47.12)/24.24\right]} \quad [S87]$$

Formulated as a channel with vessel strain-control of  $Ca^{2+}$  and  $Na^+$  gating voltage, which is same as Kapela et al. formulation except the following two equations now replace [S73]:

$$V_{NSC\varepsilon CC}^{off} = V_{NSC\varepsilon CC}^{off \max} \frac{\varepsilon_{total}^{n_{NSC\varepsilon CC}}}{\varepsilon_{50,NSC\varepsilon CC}^{n_{NSC\varepsilon CC}} + \varepsilon_{total}^{n_{NSC\varepsilon CC}}} \quad [S88]$$

$$P_{O_{NSC}} = 0.4344 + \frac{0.5656}{1 + \exp\left[-(V_m + V_{NSC\varepsilon CC}^{off} - 47.12)/24.24\right]} \quad [S89]$$

*Store-operated non-selective cation channel:*

$$\bar{P}_{SOC} = \frac{1}{1 + Ca_{SRu} / K_{SOC}} \quad [S90]$$

$$I_{NaSOC} = g_{NaSOC} P_{SOC} (V_m - E_{Na}) \quad [S91]$$

$$I_{CaSOC} = g_{CaSOC} P_{SOC} (V_m - E_{Ca}) \quad [S92]$$

$$I_{SOC} = I_{NaSOC} + I_{CaSOC} \quad [S93]$$

$$\frac{dP_{SOC}}{dt} = \frac{\bar{P}_{SOC} - P_{SOC}}{\tau_{SOC}} \quad [S94]$$

$Ca^{2+}$ -activated  $Cl$  channel:

$$\alpha_{Cl} = \frac{cGMP^{n_{ClcGMP}}}{cGMP^{n_{ClcGMP}} + K_{ClcGMP}^{n_{ClcGMP}}} \quad [S95]$$

$$K_{ClCa cGMP} = 4 \times 10^{-4} (1 - 0.9 \alpha_{Cl}) \quad [S96]$$

$$P_{Cl} = R_{ClcGMP}^{\min} \frac{Ca_i^{n_{ClCa}}}{Ca_i^{n_{ClCa}} + K_{ClCa}^{n_{ClCa}}} + \alpha_{Cl} \frac{Ca_i^{n_{ClCa}}}{Ca_i^{n_{ClCa}} + K_{ClCa cGMP}^{n_{ClCa}}} \quad [S97]$$

$$I_{ClCa} = C_m g_{ClCa} P_{Cl} (V_m - E_{Cl}) \quad [S98]$$

Plasma membrane  $Ca^{2+}$ -ATPase:

$$I_{PMCA} = \bar{I}_{PMCA} \frac{Ca_i}{Ca_i + K_{mPMCA}} \quad [S99]$$

Plasma membrane  $Na^+$ - $Ca^{2+}$  exchanger:

$$R_{NCXcGMP} = 1 + 0.55 \frac{cGMP}{cGMP + 4.5 \times 10^{-2}} \quad [S100]$$

$$\phi_F = \exp\left(\frac{\gamma_{NCX} V_m F}{RT}\right) \quad [S101]$$

$$\phi_R = \exp\left[\frac{(\gamma_{NCX} - 1) V_m F}{RT}\right] \quad [S102]$$

$$I_{NCX} = g_{NCX} R_{NCXcGMP} \frac{Na_i^3 Ca_e \phi_F - Na_e^3 Ca_i \phi_R}{1 + d_{NCX} (Na_e^3 Ca_i + Na_i^3 Ca_e)} \quad [S103]$$

$Na^+$ - $K^+$  pump:

$$I_{NaK} = C_m \bar{I}_{NaK} Q_{NaK} \frac{K_e^{n_{HKe}}}{K_e^{n_{HKe}} + K_{dKe}^{n_{HKe}}} \frac{Na_i^{n_{HNai}}}{Na_i^{n_{HNai}} + K_{dNai}^{n_{HNai}}} \frac{V_m + 150}{V_m + 200} \quad [S104]$$

$Na^+$ - $K^+$ - $Cl$  cotransporter:

$$R_{NaKClcGMP} = 1 + 3.5 \frac{cGMP}{cGMP + 6.4 \times 10^{-3}} \quad [S105]$$

$$I_{ClNaKCl} = -A_m R_{NaKClcGMP} L_{NaKCl} z_{Cl} FRT \ln \left[ \left( \frac{Na_e}{Na_i} \right) \left( \frac{K_e}{K_i} \right) \left( \frac{Cl_e}{Cl_i} \right)^2 \right] \quad [S106]$$

$$I_{NaNaKCl} = -\frac{I_{ClNaKCl}}{2} \quad [S107]$$

$$I_{KNaKCl} = -\frac{I_{ClNaKCl}}{2} \quad [S108]$$

*Sarcoplasmic reticulum IP<sub>3</sub> receptor:*

$$I_{IP_3} = \bar{I}_{IP_3} Vol_{Ca} z_{Ca} F \left( \frac{IP_3}{IP_3 + K_{IP_3}} \frac{Ca_i}{Ca_i + K_{IP_3}^{act}} h_{IP_3} \right)^3 (Ca_{SRu} - Ca_i) \quad [S109]$$

$$\frac{dh_{IP_3}}{dt} = k_{IP_3}^{on} \left[ K_{IP_3}^{inh} - (Ca_i + K_{IP_3}^{inh}) h_{IP_3} \right] \quad [S110]$$

*Sarcoplasmic reticulum SERCA, internal diffusion and release:*

$$I_{SERCA} = \bar{I}_{SERCA} \frac{Ca_i}{Ca_i + K_m^{up}} \quad [S111]$$

$$I_{tr} = \frac{Vol_{SRu} z_{Ca} F}{\tau_{tr}} (Ca_{SRu} - Ca_{SRr}) \quad [S112]$$

$$I_{rel} = \frac{Vol_{SRr} z_{Ca} F}{\tau_{rel}} (R_{10}^2 + R_{leak}) (Ca_{SRr} - Ca_i) \quad [S113]$$

$$\frac{dCa_{SRu}}{dt} = \frac{I_{SERCA} - I_{tr} - I_{IP_3}}{Vol_{SRu} z_{Ca} F} \quad [S114]$$

$$\frac{dCa_{SRr}}{dt} = \frac{I_{tr} - I_{rel}}{(Vol_{SRr} z_{Ca} F) \left[ 1 + \frac{CSQN K_{CSQN}}{(K_{CSQN} + Ca_{SRr})^2} \right]} \quad [S115]$$

*Sarcoplasmic reticulum ryanodine receptor:*

$$R_{00} = 1 - R_{10} - R_{11} - R_{01} \quad [S116]$$

$$\frac{dR_{10}}{dt} = K_{r1} Ca_i^2 R_{00} - (K_{mr1} + K_{r2} Ca_i) R_{10} + K_{mr2} R_{11} \quad [S117]$$

$$\frac{dR_{11}}{dt} = K_{r2} Ca_i R_{10} - (K_{mr1} + K_{mr2}) R_{11} + K_{r1} Ca_i^2 R_{01} \quad [S118]$$

$$\frac{dR_{01}}{dt} = K_{r2} Ca_i R_{00} + K_{mr1} R_{11} - (K_{mr2} + K_{r1} Ca_i^2) R_{01} \quad [S119]$$

*α<sub>1</sub>-adrenoreceptor activation and IP<sub>3</sub> formation:*

$$\rho_{rG} = \frac{NE R_G^S}{\xi_G R_{TG} (K_{1G} + NE)} \quad [S120]$$

$$r_{hG} = \alpha_G G \frac{Ca_i}{Ca_i + K_{cG}} \quad [S121]$$



$$\frac{dR_G^S}{dt} = k_{rG}\xi_G R_{TG} - \left( k_{rG} + \frac{k_{pG}NE}{K_{1G} + NE} \right) R_G^S - k_{rG} R_{PG}^S \quad [S122]$$

$$\frac{dR_{PG}^S}{dt} = NE \left( \frac{k_{pG}R_G^S}{K_{1G} + NE} - \frac{k_{eG}R_{PG}^S}{K_{2G} + NE} \right) \quad [S123]$$

$$\frac{dG}{dt} = k_{aG}(\delta_{G0} + \rho_{rG})(G_{TG} - G) - k_{dG}G \quad [S124]$$

$$\frac{dIP_3}{dt} = \frac{r_{hG}PIP_2}{\gamma_G} - k_{degG}IP_3 \quad [S125]$$

$$\frac{dPIP_2}{dt} = -(r_{hG} + r_{rG})PIP_2 - r_{rG}\gamma_G IP_3 + r_{rG}PIP_{2T} \quad [S126]$$

*sGC activation and cGMP formation:*

$$\bar{V}_{cGMP} = V_{cGMP}^{\max} \frac{B5_{sGC}NO + NO^2}{A0_{sGC} + A1_{sGC}NO + NO^2} \quad [S127]$$

$$\tau_{sGC} = \begin{cases} \frac{1}{k_{3sGC}NO + k_{DrsGC}} & \text{if } \bar{V}_{cGMP} - V_{cGMP} \geq 0 \\ \frac{1}{k_{m2sGC} + k_{DrsGC}} & \text{otherwise} \end{cases} \quad [S128]$$

$$\frac{dV_{cGMP}}{dt} = \frac{\bar{V}_{cGMP} - V_{cGMP}}{\tau_{sGC}} \quad [S129]$$

$$\frac{dcGMP}{dt} = V_{cGMP} - k_{pdecGMP} \left( \frac{cGMP^2}{cGMP + K_{mpde}} \right) \quad [S130]$$

*Ionic balances:*

Note: For vessel stress-controlled supplementary  $Ca^{2+}$  channel (channel variant 4 with stress),  $I_{Ca\sigma CC}$  is calculated from equation [S20], otherwise it is 0. For vessel strain-controlled supplementary  $Ca^{2+}$  channel (channel variant 4 with strain),  $I_{Ca\varepsilon CC}$  is calculated from equation [S23], otherwise it is 0. For vessel stress-controlled supplementary  $Na^+$  channel (channel variant 5 with stress),  $I_{Na\sigma CC}$  is calculated from equation [S26], otherwise it is 0. For vessel strain-controlled supplementary  $Na^+$  channel (channel variant 5 with strain),  $I_{Na\varepsilon CC}$  is calculated from equation [S29], otherwise it is 0.

$$I_{Catotm} = I_{CaSOC} + I_{VOCC} - 2I_{NCX} + I_{PMCA} + I_{CaNSC} + I_{Ca\sigma CC} + I_{Ca\varepsilon CC} \quad [S131]$$

$$I_{Natotm} = I_{NaNaKCl} + I_{NaSOC} + 3I_{NaK} + 3I_{NCX} + I_{NaNSC} + I_{Na\sigma CC} + I_{Na\varepsilon CC} \quad [S132]$$

$$I_{Ktotm} = I_{KNaKCl} + I_{BKCa} + I_{Kv} + I_{KNSC} + I_{Kleak} - 2I_{NaK} \quad [S133]$$

$$I_{Cltotm} = I_{ClNaKCl} + I_{ClCa} \quad [S134]$$

$$\frac{dCa_i}{dt} = -\frac{I_{Catom} + I_{SERCA} - I_{rel} - I_{IP3}}{Vol_{Ca} z_{Ca} F} \left( \frac{1}{1 + \frac{\bar{S}_{CM} K_{dCM}}{(K_{dCM} + Ca_i)^2} + \frac{\bar{B}_F K_{dB}}{(K_{dB} + Ca_i)^2}} \right) \quad [S135]$$

$$\frac{dNa_i}{dt} = -\frac{I_{Natom}}{Vol_i z_{Na} F} \quad [S136]$$

$$\frac{dK_i}{dt} = -\frac{I_{Ktotm}}{Vol_i z_K F} \quad [S137]$$

$$\frac{dCl_i}{dt} = -\frac{I_{Cltom}}{Vol_i z_{Cl} F} \quad [S138]$$

*Membrane potential:*

Note: Mechanically controlled supplementary channel currents ( $I_{Ca\sigma CC}$ ,  $I_{Ca\epsilon CC}$ ,  $I_{Na\sigma CC}$  and  $I_{Na\epsilon CC}$ ) are calculated as for the ionic balances as noted above.

$$\frac{dV_m}{dt} = -\frac{1}{C_m} (I_{VOCC} + I_{BKCa} + I_{Kv} + I_{Kleak} + I_{NSC} + I_{SOC} + I_{ClCa} + I_{PMCA} + I_{NCX} + I_{NaK} + I_{Ca\sigma CC} + I_{Ca\epsilon CC} + I_{Na\sigma CC} + I_{Na\epsilon CC} - I_{stim}) \quad [S139]$$

Calculation of remaining fixed parameters:

$Na^+ - K^+$  pump:

$$Q_{NaK} = Q_{10}^{\frac{T-309.15}{10}} \quad [S140]$$

$\alpha_1$ -adrenoreceptor activation and  $IP_3$  formation:

$$\gamma_G = 10^{-15} N_{Avo} Vol_i \quad [S141]$$

$$\delta_{G0} = \frac{k_{dG} G_0}{k_{aG} (G_{TG} - G_0)} \quad [S142]$$

$sGC$  activation and  $cGMP$  formation:

$$B5_{sGC} = k_{2sGC} / k_{3sGC} \quad [S143]$$

$$A0_{sGC} = \frac{(k_{m1sGC} + k_{2sGC}) k_{DsGC} + k_{m1sGC} k_{m2sGC}}{k_{1sGC} k_{3sGC}} \quad [S144]$$

$$A1_{sGC} = \frac{(k_{1sGC} + k_{3sGC}) k_{DsGC} + (k_{2sGC} + k_{m2sGC}) k_{1sGC}}{k_{1sGC} k_{3sGC}} \quad [S145]$$

Setting and calculation of initial conditions:

*Vessel wall stress- or strain-activated  $Ca^{2+}$  channel:*

$$h_{Ca\sigma CC} = 0 \quad \text{or} \quad h_{Ca\epsilon CC} = 0 \quad [S146]$$

*Vessel wall stress- or strain-activated  $Na^+$  channel:*

$$h_{Na\sigma CC} = 0 \quad \text{or} \quad h_{Na\epsilon CC} = 0 \quad [S147]$$

*L-Type voltage operated  $Ca^{2+}$  channel:*

$$d_{L0} = \frac{1}{1 + \exp(-V_{m0}/8.3)} \quad [S148]$$

$$f_{L0} = \frac{1}{1 + \exp[(V_{m0} + 42)/9.1]} \quad [S149]$$

*Large conductance Ca<sup>2+</sup>-activated K<sup>+</sup> channel:*

$$R_{NO0} = \frac{NO_0}{NO_0 + 0.2 \times 10^{-3}} \quad [S150]$$

$$R_{cGMP0} = \frac{cGMP_0^2}{cGMP_0^2 + (0.55 \times 10^{-3})^2} \quad [S151]$$

$$V_{50,KCa0} = -41.7 \log(Ca_{i0}) - 128.2 - dV_{50,KCaNO0} R_{NO0} - dV_{50,KCaGMP0} R_{cGMP0} \quad [S152]$$

$$p_{f0} = \frac{1}{1 + \exp[-(V_{m0} - V_{50,KCa0})/18.25]} \quad [S153]$$

$$p_{s0} = \frac{1}{1 + \exp[-(V_{m0} - V_{50,KCa0})/18.25]} \quad [S154]$$

*Voltage dependent K<sup>+</sup> channel:*

$$p_{K0} = \frac{1}{1 + \exp[-(V_{m0} + 11)/15]} \quad [S155]$$

$$q_{10} = \frac{1}{1 + \exp[(V_{m0} + 40)/14]} \quad [S156]$$

$$q_{20} = \frac{1}{1 + \exp[(V_{m0} + 40)/14]} \quad [S157]$$

*Store-operated non-selective cation channel:*

$$P_{SOC0} = 0 \quad [S158]$$

*Sarcoplasmic reticulum IP<sub>3</sub> receptor:*

$$h_{IP30} = \frac{K_{IP3}^{inh}}{Ca_{i0} + K_{IP3}^{inh}} \quad [S159]$$

*Sarcoplasmic reticulum SERCA, internal diffusion and release:*

$$Ca_{SRi0} = 0.66 \quad [S160]$$

$$Ca_{SRr0} = 0.57 \quad [S161]$$

*Sarcoplasmic reticulum ryanodine receptor:*

$$R_{100} = 0.0033 \quad [S162]$$

$$R_{110} = 4 \times 10^{-6} \quad [S163]$$

$$R_{010} = 0.9955 \quad [S164]$$

*α<sub>1</sub>-adrenoreceptor activation and IP<sub>3</sub> formation:*

$$r_{hG0} = \frac{k_{degG} \gamma_G IP_{30}}{PIP_{20}} \quad [S165]$$

$$R_{G0}^S = R_{TG} \xi_G \quad [S166]$$

$$R_{PG0}^S = 0 \quad [S167]$$

$$G_0 = \frac{r_{hG0} (K_{cG} + Ca_{i0})}{\alpha_G Ca_{i0}} \quad [S168]$$

$$IP_{30} = 0 \quad [S169]$$

$$PIP_{20} = PIP_{2T} - (1 + k_{degG}/r_{rG}) \gamma_G IP_{30} \quad [S170]$$

*sGC activation and cGMP formation:*

$$V_{cGMP0} = 0 \quad [S171]$$

$$cGMP_0 = 0 \quad [S172]$$

*Ionic balances:*

$$Ca_{i0} = 68 \times 10^{-6} \quad [S173]$$

$$Na_{i0} = 8.4 \quad [S174]$$

$$K_{i0} = 140 \quad [S175]$$

$$Cl_{i0} = 59.4 \quad [S176]$$

*Membrane potential:*

$$V_{m0} = -59.4 \quad [S177]$$

### 3. TABLES OF OPTIMIZED PARAMETERS

Table S4: Optimized parameters to fit of steady-state VSM crossbridge activation

| Optimized parameter | Description                                          | Units    | Value  |
|---------------------|------------------------------------------------------|----------|--------|
| $n_{XB}$            | Sensitivity of VSM activation to $Ca^{2+}$           | unitless | 3.1984 |
| $K_{CaXB}$          | $\frac{1}{2}$ activation VSM $Ca^{2+}$ concentration | $\mu M$  | 0.2066 |

Table S5: Optimized parameters of myogenic response fits with nine different hypothetical vessel stress-controlled channel variants

| Optimized parameter                                                                 | Description                                                        | Units    | Value      |         |
|-------------------------------------------------------------------------------------|--------------------------------------------------------------------|----------|------------|---------|
|                                                                                     |                                                                    |          | Mesenteric | Femoral |
| NSC with stress-controlled $Ca^{2+}$ conductance (CaNSC $\sigma$ CC)                |                                                                    |          |            |         |
| $\rho_{CaNSC\sigma CC}^{\max}$                                                      | CaNSC $\sigma$ CC max ratio of $\sigma$ -control to normal conduct | unitless | 5.628      | 14.610  |
| $n_{CaNSC\sigma CC}$                                                                | CaNSC $\sigma$ CC sensitivity to stress                            | unitless | 3.475      | 1.790   |
| $\sigma_{50,CaNSC\sigma CC}$                                                        | CaNSC $\sigma$ CC $\frac{1}{2}$ activation stress                  | kPa      | 82.690     | 76.746  |
| NSC with stress-controlled $Na^{+}$ conductance (NaNSC $\sigma$ CC)                 |                                                                    |          |            |         |
| $\rho_{NaNSC\sigma CC}^{\max}$                                                      | NaNSC $\sigma$ CC max ratio of $\sigma$ -control to normal conduct | unitless | 6.997      | 7.931   |
| $n_{NaNSC\sigma CC}$                                                                | NaNSC $\sigma$ CC sensitivity to stress                            | unitless | 4.161      | 2.742   |
| $\sigma_{50,NaNSC\sigma CC}$                                                        | NaNSC $\sigma$ CC $\frac{1}{2}$ activation stress                  | kPa      | 82.245     | 34.107  |
| NSC with stress-controlled gating voltage (NSC $\sigma$ CC)                         |                                                                    |          |            |         |
| $V_{NSC\sigma CC}^{off \max}$                                                       | NSC $\sigma$ CC max offset of gating voltage                       | mV       | 403.429    | 665.142 |
| $n_{NSC\sigma CC}$                                                                  | NSC $\sigma$ CC sensitivity to stress                              | unitless | 2.299      | 1.136   |
| $\sigma_{50,NSC\sigma CC}$                                                          | NSC $\sigma$ CC $\frac{1}{2}$ activation stress                    | kPa      | 91.222     | 82.789  |
| Supplementary $Ca^{2+}$ channel with stress-controlled conductance (Ca $\sigma$ CC) |                                                                    |          |            |         |
| $g_{Ca\sigma CC}^{\max}$                                                            | Ca $\sigma$ CC maximal conductance                                 | pA/mV    | 2.365      | 3.926   |
| $n_{Ca\sigma CC}$                                                                   | Ca $\sigma$ CC sensitivity to stress                               | unitless | 1.647      | 1.755   |
| $\sigma_{50,Ca\sigma CC}$                                                           | Ca $\sigma$ CC $\frac{1}{2}$ activation stress                     | kPa      | 1881.08    | 764.942 |
| Supplementary $Na^{+}$ channel stress-controlled conductance (Na $\sigma$ CC)       |                                                                    |          |            |         |
| $g_{Na\sigma CC}^{\max}$                                                            | Na $\sigma$ CC maximal conductance                                 | pA/mV    | 4.272      | 5.139   |
| $n_{Na\sigma CC}$                                                                   | Na $\sigma$ CC sensitivity to stress                               | unitless | 2.707      | 1.948   |
| $\sigma_{50,Na\sigma CC}$                                                           | Na $\sigma$ CC $\frac{1}{2}$ activation stress                     | kPa      | 300.937    | 211.178 |

L-type  $Ca^{2+}$  channel with stress-controlled gating voltage (CaL $\sigma$ CC)

|                                                                                                                                    |                                                                          |          |        |         |
|------------------------------------------------------------------------------------------------------------------------------------|--------------------------------------------------------------------------|----------|--------|---------|
| $V_{CaL\sigma CC}^{off\ max}$                                                                                                      | CaL $\sigma$ CC maximal membrane potential offset                        | mV       | 32.490 | 71.636  |
| $n_{CaL\sigma CC}$                                                                                                                 | CaL $\sigma$ CC sensitivity to stress                                    | unitless | 2.875  | 1.346   |
| $\sigma_{50,Ca\sigma CC}$                                                                                                          | CaL $\sigma$ CC $\frac{1}{2}$ activation stress                          | kPa      | 74.463 | 68.855  |
| L-type Ca <sup>2+</sup> channel with stress-controlled conductance ( $\rho$ CaL $\sigma$ CC)                                       |                                                                          |          |        |         |
| $\rho_{\rho CaL\sigma CC}^{max}$                                                                                                   | $\rho$ CaL $\sigma$ CC max ratio of $\sigma$ -control to normal conduct  | unitless | 7.134  | 20.000  |
| $n_{\rho CaL\sigma CC}$                                                                                                            | $\rho$ CaL $\sigma$ CC sensitivity to stress                             | unitless | 3.194  | 1.535   |
| $\sigma_{50,\rho CaL\sigma CC}$                                                                                                    | $\rho$ CaL $\sigma$ CC $\frac{1}{2}$ activation stress                   | kPa      | 76.946 | 84.928  |
| Large conductance Ca <sup>2+</sup> -activated K <sup>+</sup> channel with stress-controlled gating voltage (BKCa $\sigma$ CC)      |                                                                          |          |        |         |
| $V_{BKCa\sigma CC}^{off\ max}$                                                                                                     | BKCa $\sigma$ CC maximal membrane potential offset                       | mV       | 20.00  | 19.866  |
| $n_{BKCa\sigma CC}$                                                                                                                | BKCa $\sigma$ CC sensitivity to stress                                   | unitless | 2.000  | 2.504   |
| $\sigma_{50,BKCa\sigma CC}$                                                                                                        | BKCa $\sigma$ CC $\frac{1}{2}$ activation stress                         | kPa      | 54.598 | 1010.50 |
| Large conductance Ca <sup>2+</sup> -activated K <sup>+</sup> channel with stress-controlled conductance ( $\rho$ BKCa $\sigma$ CC) |                                                                          |          |        |         |
| $\rho_{\rho BKCa\sigma CC}^{max}$                                                                                                  | $\rho$ BKCa $\sigma$ CC max ratio of $\sigma$ -control to normal conduct | unitless | 0.000  | 0.000   |
| $n_{\rho BKCa\sigma CC}$                                                                                                           | $\rho$ BKCa $\sigma$ CC sensitivity to stress                            | unitless | 2.027  | 1.711   |
| $\sigma_{50,\rho BKCa\sigma CC}$                                                                                                   | $\rho$ BKCa $\sigma$ CC $\frac{1}{2}$ activation stress                  | kPa      | 49.620 | 1.648   |

#### 4. COMPARISON OF THIN AND THICK WALL FORMULATION

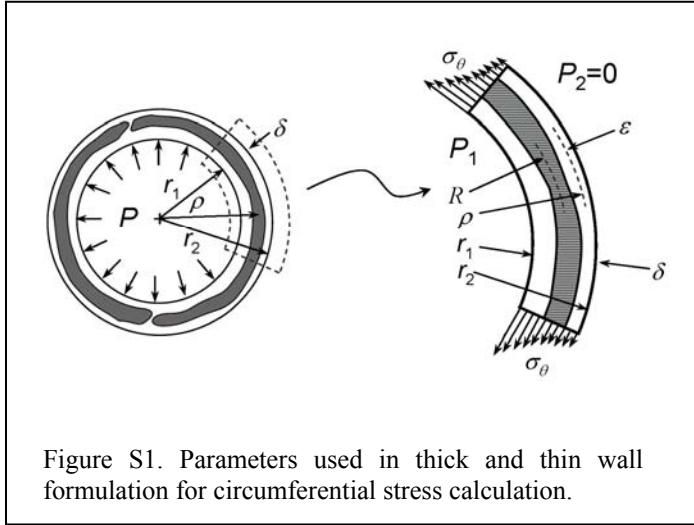

Figure S1. Parameters used in thick and thin wall formulation for circumferential stress calculation.

The thin wall vessel formulation for calculating average vessel wall stress (also known as the Law of Laplace) assumes the vessel wall is thin enough compared to the internal radius to have roughly constant circumferential stress across the vessel wall. In many cases this is true however when the arterioles analyzed in this study contract to very small internal diameters the circumferential stress on the inner and outer surfaces of the vessel wall may deviate from that approximated with the thin wall formulation. To estimate the error between the thin and thick walled

circumferential stress formulation for each steady state diameter reached in these experimental studies we first cast the two formulations as follows:

Thick wall circumferential stress formulation:

$$\sigma_{\theta,TKW}(\rho) = \frac{P_1}{1 - r_1^2/r_2^2} \left( \frac{r_1^2}{r_2^2} + \frac{r_1^2}{\rho^2} \right) \quad [S178]$$

where  $\sigma_{\theta,TKW}$  is the thick wall formulation circumferential stress,  $P_1$  is the intraluminal pressure,  $r_1$  is the inner radius,  $r_2$  is the outer radius and  $\rho$  is the vessel wall position where we are calculating the stress. If we let:

$$r_1 = R - \delta/2; \quad r_2 = R + \delta/2; \quad \rho = R + \varepsilon \quad [S179]$$

where  $R$  is the midline radius,  $\delta$  is the vessel wall thickness and  $\varepsilon$  varies from  $-\delta/2$  to  $\delta/2$  then we have for the thick walled stress at the normalized distance  $\varepsilon/R$ :

$$\frac{\sigma_{\theta,TKW}(\varepsilon/R)}{P_1} = \frac{\left[ \frac{1 - \delta/R + \frac{1}{4}(\delta^2/R^2)}{1 + \delta/R + \frac{1}{4}(\delta^2/R^2)} \right] + \left[ \frac{1 - \delta/R + \frac{1}{4}(\delta^2/R^2)}{1 + 2(\varepsilon/R) + (\varepsilon^2/R^2)} \right]}{1 - \left[ \frac{1 - \delta/R + \frac{1}{4}(\delta^2/R^2)}{1 + \delta/R + \frac{1}{4}(\delta^2/R^2)} \right]} \quad [S180]$$

Thin wall circumferential stress formulation:

$$\sigma_{\theta,TnW} = \frac{P_1 r_1}{\delta} = \frac{P_1 (R - \delta/2)}{\delta} \quad [S181]$$

where  $\sigma_{\theta,TnW}$  is the thin wall formulation circumferential stress. Rearranging we have:

$$\frac{\sigma_{\theta, ThW}}{P_1} = \frac{1}{\delta/R} - \frac{1}{2} \quad [S182]$$

The standard rule of thumb for the thin walled approximation to be valid is a radius to wall thickness ratio,  $R/\delta$  of 20. In the mesenteric arteriole dataset the  $R/\delta$  ranges from 5 to 12 and with the femoral arteriole dataset the range is 2.5 to 5.25 so the thin walled approximation appears to be not valid in this case. However in our problem we are trying to estimate the stress across the VSM cell that spans the midline of the vessel wall where the error between thin wall and thick wall stress formulations is much smaller. Shown below in Figure S2A, B we see the error between the thick walled and thin walled vessel formulation for each data point in the mesenteric and femoral datasets. Error is given for inner wall, at 25%, at 50%, at 75% and outer vessel wall stress for each steady state diameter. If we assume the VSM cell occupies the middle 50% of the vessel wall we see that the average stress over the VSM cell varies by less than 0.5% and 2% between the two formulations over the mesenteric and femoral datasets respectively. More accurate stress values can be obtained with the thick walled vessel formulation if more detailed knowledge about how and where the stress is sensed in VSM cells. Additionally even if in this study we are underestimating or overestimating the circumferential stress we are not altering the trend in circumferential stress with changes in intraluminal pressure. Therefore free parameters in the model may change but the conclusions remain unaltered concerning which stress-controlled channel variants are able to describe the steady state myogenic response.

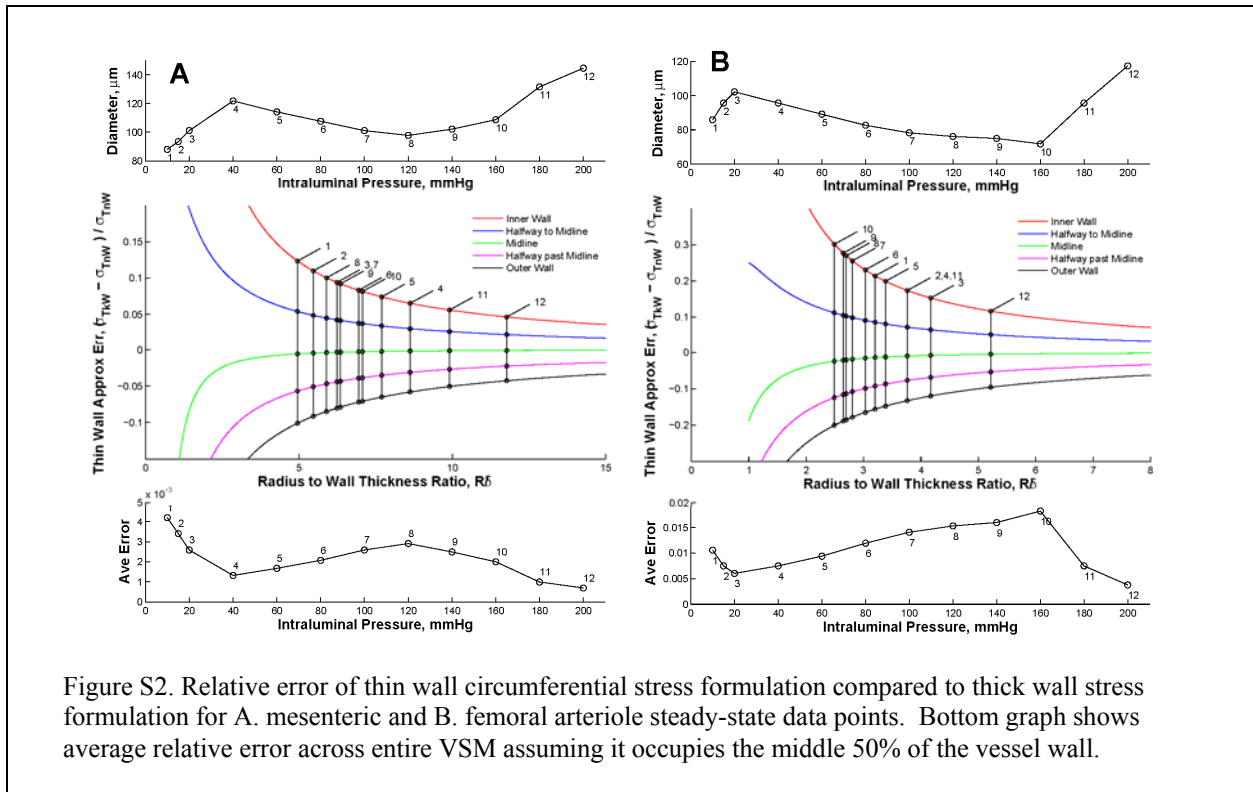



## 5. REFERENCES

1. **Albert AP and Large WA.** Store-operated  $\text{Ca}^{2+}$ -permeable non-selective cation channels in smooth muscle cells. *Cell Calcium* 33: 345-356, 2003.
2. **Arnon A, Hamlyn JM, and Blaustein MP.**  $\text{Na}^+$  entry via store-operated channels modulates  $\text{Ca}^{2+}$  signaling in arterial myocytes. *American Journal of Physiology-Cell Physiology* 278: C163-C173, 2000.
3. **Baro I and Eisner DA.** Factors controlling changes in intracellular  $\text{Ca}^{2+}$  concentration produced by noradrenaline in rat mesenteric artery smooth muscle cells. *Journal of Physiology* 482 ( Pt 2): 247-258, 1995.
4. **Benham CD, Bolton TB, Lang RJ, and Takewaki T.** Calcium-activated potassium channels in single smooth muscle cells of rabbit jejunum and guinea-pig mesenteric artery. *Journal of Physiology* 371: 45-67, 1986.
5. **Bennett MR, Farnell L, and Gibson WG.** A quantitative description of the contraction of blood vessels following the release of noradrenaline from sympathetic varicosities. *Journal of Theoretical Biology* 234: 107-122, 2005.
6. **Bund SJ.** Spontaneously hypertensive rat resistance artery structure related to myogenic and mechanical properties. *Clinical Science* 101: 385-393, 2001.
7. **Camello C, Lomax R, Petersen OH, and Tepikin AV.** Calcium leak from intracellular stores - the enigma of calcium signalling. *Cell Calcium* 32: 355-361, 2002.
8. **Carlson BE and Secomb TW.** A theoretical model for the myogenic response based on the length-tension characteristics of vascular smooth muscle. *Microcirculation* 12: 327-338, 2005.
9. **Diederich D, Yang ZH, Buhler FR, and Luscher TF.** Impaired endothelium-dependent relaxations in hypertensive resistance arteries involve cyclooxygenase pathway. *American Journal of Physiology - Heart and Circulatory Physiology* 258: H445-H451, 1990.
10. **Fink CC, Slepchenko B, and Loew LM.** Determination of time-dependent inositol-1,4,5-trisphosphate concentrations during calcium release in a smooth muscle cell. *Biophysical Journal* 77: 617-628, 1999.
11. **Inoue R, Okada T, Onoue H, Hara Y, Shimizu S, Naitoh S, Ito Y, and Mori Y.** The transient receptor potential protein homologue TRP6 is the essential component of vascular  $\alpha_1$ -adrenoceptor-activated  $\text{Ca}^{2+}$ -permeable cation channel. *Circulation Research* 88: 325-332, 2001.
12. **Jafri MS, Rice JJ, and Winslow RL.** Cardiac  $\text{Ca}^{2+}$  dynamics: the roles of ryanodine receptor adaptation and sarcoplasmic reticulum load. *Biophysical Journal* 74: 1149-1168, 1998.
13. **Kapela A, Bezerianos A, and Tsoukias NM.** A mathematical model of  $\text{Ca}^{2+}$  dynamics in rat mesenteric smooth muscle cell: agonist and NO stimulation. *Journal of Theoretical Biology* 253: 238-260, 2008.

14. **Koenigsberger M, Sauser R, Beny JL, and Meister JJ.** Effects of arterial wall stress on vasomotion. *Biophysical Journal* 91: 1663-1674, 2006.
15. **Lindblad DS, Murphey CR, Clark JW, and Giles WR.** A model of the action potential and underlying membrane currents in a rabbit atrial cell. *American Journal of Physiology-Heart and Circulatory Physiology* 271: H1666-H1696, 1996.
16. **Lozinskaya IM and Cox RH.** Effects of age on Ca<sup>2+</sup> currents in small mesenteric artery myocytes from Wistar-Kyoto and spontaneously hypertensive rats. *Hypertension* 29: 1329-1336, 1997.
17. **Lu Y, Zhang J, Tang G, and Wang R.** Modulation of voltage-dependent K<sup>+</sup> channel current in vascular smooth muscle cells from rat mesenteric arteries. *Journal of Membrane Biology* 180: 163-175, 2001.
18. **Matchkov VV, Aalkjaer C, and Nilsson H.** A cyclic GMP-dependent calcium-activated chloride current in smooth-muscle cells from rat mesenteric resistance arteries. *Journal of General Physiology* 123: 121-134, 2004.
19. **Miller J and Carsten M.** Calcium homeostasis in smooth muscle. In: *Cellular Aspects of Smooth Muscle Function*, edited by Kao C and Carsten M. Cambridge: Cambridge University Press, 1997.
20. **Mistry DK and Garland CJ.** Nitric oxide (NO)-induced activation of large conductance Ca<sup>2+</sup>-dependent K<sup>f</sup> channels (BKCa) in smooth muscle cells isolated from the rat mesenteric artery. *British Journal of Pharmacology* 124: 1131-1140, 1998.
21. **Nakamura Y, Ohya Y, Abe I, and Fujishima M.** Sodium-potassium pump current in smooth muscle cells from mesenteric resistance arteries of the guinea-pig. *Journal of Physiology* 519: 203-212, 1999.
22. **Nelson MT and Quayle JM.** Physiological roles and properties of potassium channels in arterial smooth muscle. *American Journal of Physiology-Cell Physiology* 268: C799-C822, 1995.
23. **Odonnell ME and Owen NE.** Regulation of ion pumps and carriers in vascular smooth muscle. *Physiological Reviews* 74: 683-721, 1994.
24. **Parekh AB and Putney JW.** Store-operated calcium channels. *Physiological Reviews* 85: 757-810, 2005.
25. **Smirnov SV, Knock GA, and Aaronson PI.** Effects of the 5-lipoxygenase activating protein inhibitor MK886 on voltage-gated and Ca<sup>2+</sup>-activated K<sup>+</sup> currents in rat arterial myocytes. *British Journal of Pharmacology* 124: 572-578, 1998.
26. **Stockand JD and Sansom SC.** Mechanism of activation by cGMP-dependent protein kinase of large Ca<sup>2+</sup>-activated K<sup>+</sup> channels in mesangial cells. *American Journal of Physiology-Cell Physiology* 271: C1669-C1677, 1996.
27. **Tsoukias NM, Kavdia M, and Popel AS.** A theoretical model of nitric oxide transport in arterioles: frequency- vs. amplitude-dependent control of cGMP formation. *American Journal of Physiology-Heart and Circulatory Physiology* 286: H1043-H1056, 2004.

28. **Volpe P, Martini A, Furlan S, and Meldolesi J.** Calsequestrin is a component of smooth muscles: the skeletal- and cardiac-muscle isoforms are both present, although in highly variable amounts and ratios. *Biochemical Journal* 301 ( Pt 2): 465-469, 1994.
29. **Wang CL.** A note on  $\text{Ca}^{2+}$  binding to calmodulin. *Biochemical and Biophysical Research Communications* 130: 426-430, 1985.
30. **Yang J, Clark JW, Bryan RM, and Robertson C.** The myogenic response in isolated rat cerebrovascular arteries: smooth muscle cell model. *Medical Engineering and Physics* 25: 691-709, 2003.
31. **Yang J, Clark JW, Bryan RM, and Robertson CS.** Mathematical modeling of the nitric oxide/cGMP pathway in the vascular smooth muscle cell. *American Journal of Physiology-Heart and Circulatory Physiology* 289: H886-H897, 2005.
